# Supplementary material for: Impact of irrigation, nitrogen fertilization, and plant density on stay-green and its effects on agronomic traits in maize
Source: Front Plant Sci. 2024 Sep 6;15:1399072. doi: 10.3389/fpls.2024.1399072 (PMC11414411; doi:10.3389/fpls.2024.1399072)
Supplement: Supplementary file 2 [file Table1.xlsx]

## Sheet: Supplementary Table 1
	Supplementary Table 1: Soil analysis before sowing for both locations Tomeza and Xinzo of Galicia region for the experiment made in 2018.
	Elements	N(mg/kg)	NO3(mg/kg)	NH4(mg/kg)	C(mg/kg)
	Tomeza	3.96	7.55	5.33	26.36
	Xinzo	1.55	4.26	3.35	11.71
	(N(mg/kg): total nitrogen content in soil, NO3(mg/kg): Nitrate content in soil; NH4: ammonium content in soil; C(mg/kg); total carbon content in soil).

## Sheet: Supplementary Table 2
	Supplementary Table 2. Means1, standard errors, and comparison between four SG2 and four NSG for phenological traits under different conditions of water, nitrogen and plant density evaluated in 2018 and 2019 in two locations of Galicia region.
	Factors	levels	DS (Days)					ASI(Days)					DPM (Days)					Chlor45(SPAD)					FvFm45(μmol m−2 s−1)
			Env1	Env2	Env3	Env4	comb	Env1	Env2	Env3	Env4	comb	Env1	Env2	Env3	Env4	comb	Env1	Env2	Env3	Env4	comb	Env1	Env2	Env3	Env4	comb
			Mean±SE	Mean±SE	Mean±SE	Mean±SE	Mean±SE	Mean±SE	Mean±SE	Mean±SE	Mean±SE	Mean±SE	Mean±SE	Mean±SE	Mean±SE	Mean±SE	Mean±SE	Mean±SE	Mean±SE	Mean±SE	Mean±SE	Mean±SE	Mean±SE	Mean±SE	Mean±SE	Mean±SE	Mean±SE
	WI	HW	77.0±0.3a	87.3±0.5b	81.2±0.4a	96.6±1a	85.5±0.2a	0.5±0.1a	3.3±0.3a	2.1±0.4a	3.9±0.5a	2.4±0.2b	77.7±0.8a	81.3±1a	76.6±1a	83.8±0.6a	79.9±0.4a	22±2a	10±0.7a	33±1a	18±1a	21±3a	0.70±0.03a	0.55±0.04a	0.72±0.01a	0.57±0.02a	0.64±0.04a
		LW	76.3±0.3a	89.7±0.5a	81.8±0.4a	96.2±1a	86.0±0.2a	0.5±0.1a	4.2±0.3b	3.1±0.4a	4.5±0.5a	3.1±0.2a	74.6±0.8b	78.7±1b	74.9±1a	84.6±0.6a	78.3±0.4a	8±2b	11±0.7a	22±1b	16±1b	14±3b	0.40±0.03b	0.58±0.04a	0.70±0.01b	0.53±0.02a	0.55±0.04a
	NF	N3	76.4±0.4b	87.9±0.5b	81.3±0.5a	95.3±2b	85.2±0.3b	0.4±0.2a	3.3±0.4b	2.3±0.5a	3.2±0.6b	2.3±0.2b	75.9±0.9a	80.9±1a	76.1±1a	84.8±0.8a	79.5±0.4a	17±2a	14±0.8a	30±1a	19±1a	20±3a	0.60±0.04a	0.55±0.05a	0.71±0.01a	0.57±0.03a	0.61±0.04a
		N2	76.4±0.4ab	87.8±0.5b	82.2±0.5a	97.7±2a	86.0±0.3a	0.5±0.2a	3.1±0.4b	3.2±0.5a	5.1±0.6a	3.0±0.2a	77.2±0.9a	79.8±1a	76.2±1a	83.2±0.8a	79.2±0.4a	15±2ab	10±0.8b	23±1b	15±1c	16±3b	0.52±0.04b	0.59±0.05a	0.70±0.01a	0.53±0.03a	0.58±0.04a
		N1	77.5±0.4a	89.7±0.5a	80.9±0.5a	96.3±2ab	86.1±0.3a	0.6±0.2a	4.9±0.4a	2.3±0.5a	4.3±0.6ab	3.0±0.2a	75.5±0.9a	79.4±1a	74.9±1a	84.5±0.8a	78.6±0.4a	14±2b	9±0.8b	28±1a	17±1b	17±3b	0.55±0.04ab	0.56±0.05a	0.71±0.01a	0.55±0.03a	0.59±0.04a
	PD	R	76..5±0.3a	87.7±0.5b	81.0±0.4a	95.7±1a	85.3±0.2b	0.3±0.2a	3.4±0.3a	2.4±0.4a	3.7±0.5a	2.4±0.2b	76.1±0.8a	80.5±1a	75.4±1a	8.7±0.6a	79.2±0.4a	16±2a	11±0.7a	28±1a	17±1a	18±3a	0.56±0.03a	0.57±0.04a	0.70±0.01a	0.57±0.02a	0.60±0.04a
		H	76.9±0.3a	89.3±0.5a	81.9±0.4a	97.1±1a	86.3±0.2a	0.7±0.2a	4.2±0.3a	3.0±0.4a	4.7±0.5a	3.1±0.2a	76.3±0.8a	79.5±1a	76.1±1a	83.6±0.6a	78.9±0.4a	14±2a	10±0.7a	26±1a	17±1a	17±3a	0.55±0.03a	0.57±0.04a	0.71±0.01a	0.54±0.02a	0.60±0.4a
	SGT	NSG	77.2±0.3a	89.0±0.5a	81.1±0.4a	96.2±1a	85.9±0.2a	0.8±0.2a	3.6±0.3a	2.2±0.4a	3.9±0.5a	2.6±0.2a	76.1±0.8a	79.0±1b	72.4±1b	83.3±0.6b	77.7±0.4b	13±2b	9±0.7b	24±1b	14±1b	15±3b	0.54±0.03a	0.51±0.04b	0.71±0.01a	0.53±0.02a	0.57±0.04b
		SG	76.2±0.3b	87.9±0.5a	81.6±0.4a	96.7±1a	85.6±0.2a	0.3±0.2b	3.9±0.3a	3.0±0.4a	4.5±0.5a	2.9±0.2a	76.3±0.8a	81.0±1a	79.1±1a	85.1±0.6a	80.4±0.4a	17±2a	13±0.7a	30±1a	19±1a	20±3a	0.57±0.03a	0.62±0.04a	0.71±0.01a	0.57±0.02a	0.62±0.04a
	1 Means followed by the same letter, within the same column and factor, are not significantly different.2 WI: Water Irrigation; NL: Nitrogen Fertilization; PD: Plant density; SGT: Stay-green trait; SG: Stay-green genotypes; NSG: non-stay-green genotypes; HW: high water irrigation; LW: low water irrigation; N3, N2, N1: nitrogen fertilization (0U), (30U) and (90U), respectively; DS: Days to silking…

## Sheet: Supplementary Table 3
	Supplementary Table 3. Means1, standard errors, and comparison between SG2 and NSG for stover production and moisture at flowering and harvest time under different conditions of water irrigation, nitrogen fertilization and plant density evaluated in 2018 and 2019 in two locations of Galicia region.
	Factors	levels	SYF (Kg ha-1)					SMF (%)					SYH (kg/ha)					SMH (%)
			Env1	Env2	Env3	Env4	Comb	Env1	Env2	Env3	Env4	comb	Env1	Env2	Env3	Env4	comb	Env1	Env2	Env3	Env4	comb
			Mean±SE	Mean±SE	Mean±SE	Mean±SE	Mean±SE	Mean±SE	Mean±SE	Mean±SE	Mean±SE	Mean±SE	Mean±SE	Mean±SE	Mean±SE	Mean±SE	Mean±SE	Mean±SE	Mean±SE	Mean±SE	Mean±SE	Mean±SE
	WI	HW	8050±354a	6732±217a	8909±164a	6078±860a	7436±669a	85±0.3a	81±0.2a	84±0.2a	84±0.2a	83.5±0.1a	7912±589a	5373±161a	8674±212a	4724±394a	6663±889a	61±2a	68±0.3a	72±1a	76±0.3a	68.8±0.3a
		LW	8370±353a	6350±217a	8176±64b	5478±860b	7097±669b	84±0.3a	79±0.2b	82±0.2b	83±0.2b	82.4±0.1b	6787±589b	4624±161b	7780±212b	4483±394a	5918±889b	56±2b	71±0.3b	70±1b	76±0.3a	68.0±0.3b
	NL	N3	7461±418b	6520±262ab	8447±201a	5948±871a	7087±674a	85±0.4a	82±0.3a	83±0.3a	84±0.3a	83.5±0.1a	7575±610a	5394±191a	8392±262a	5101±407a	6603±891a	58±2a	69±0.4b	70±1a	76±0.4a	68.2±0.3a
		N2	8665±418a	7172±266a	8523±201a	4811±871b	7293±674a	85±0.4a	80±0.3b	82±0.3b	83±0.3b	82.6±0.1b	7488±610a	4984±191ab	8027±262a	4044±407b	6138±891b	59±2a	70±0.4a	71±1a	75±0.4a	68.5±0.3a
		N1	8502±418a	5920±266b	8658±201a	6576±971a	7087±674a	84±0.4a	80±0.3b	83±0.3a	83±0.3b	82.7±0.1b	6987±610a	4618±191b	8262±262a	4665±407a	6130±891b	58±2a	69±0.4b	71±1a	75±0.4a	68.44±0.3a
	PD	R	6076±349b(122±5a)*	5171±213b(100±3a)*	7092±165b(141±3a)*	4827±860b(97±12a)*	5789±669b(115.8±10a)*	85±0.3a	81±0.2a	83±0.2a	83±0.2a	83.1±0.1a	6148±590b(123±9a)*	4211±159b(84±3a)*	6973±214b(139±3a)*	3864±394b(77±6a)*	5297±889b(106±14a)*	58±2a	69±0.3a	71±1a	76±0.3a	68.2±0.3a
		H	1034±349a(129±5a)*	7911±213a(100±3a)*	9994±165a(125±3b)*	6732±860a(84±12b)*	8743±669a(109±10b)*	84±0.3b	81±0.2a	83±0.2a	83±0.2a	82.8±0.1a	8551±590a(107±9b)*	5786±159a(72±3b)*	9481±212a(118±3b)*	5343±394a(67±6b)*	7284±889a(91±14b)*	59±2a	69±0.3a	71±1a	76±0.3a	68.6±0.3a
	SGT	NSG	8418±352a	6839±217a	8839±165a	6006±860a	7520±669a	85±0.3a	81±0.2a	84±0.2a	84±0.2a	83.6±0.1a	7281±584a	4957±161a	7380±214b	4699±394a	6082±889b	56±2b	68±0.3b	70±1a	76±0.3a	67.5±0.3b
		SG	8001±352a	6243±217a	8247±165b	5550±860a	7012±669b	84±0.3b	80±0.2b	82±0.2b	82±0.2b	82.3±0.1b	7418±584a	5040±161a	9074±214a	4508±394a	6499±889a	61±2a	70±0.3a	71±1a	76±0.3a	69.3±0.3a
	1 Means followed by the same letter, within the same column and factor, are not significantly different.2 WI: Water condition; NL: Nitrogen level; PD: Plant density; SGT: Stay-green trait; SG: Stay-green genotypes; NSG: non-stay-green genotypes; HW: high water level; LW: low water level; N3, N2, N1: nitrogen levels (0U), (30U) and (90U), respectively; SYF(kg/ha): stover yield at flowering (kg/ha)…

## Sheet: Supplementary Table 4
		Supplementary Table 4. Total N content1 at flowering time and physiological maturity of plant stover (leaf and stem), N-content in grain, and soil evaluated in maize inbred lines under different conditions of water irrigation, nitrogen fertilization and plant density during two years 2018 and 2019 in two locations in Galicia.
		Factors	Levels	KN (g kg-1)	SNF (g kg-1)	SNH (g kg-1)	TN_Hsoil (g kg-1)	NO3_Hsoil (mg kg-1)	NH4_Hsoil (mg kg-1)
		WI	HW	15.8±1a	14.3±1a	9.1±1a	1.5±0.05a	5.9±2.3a	9.1±1.4a
			LW	16.7±1a	13.8±1a	10.4±1a	1.6±0.05a	8.8±2.3a	8.1±1.4a
		NF	N3	16.3±1a	15.2±1a	10.3±1a	1.7±0.05a	7.9±2.3a	9.1±1.4a
			N2	16.3±1a	13.4±1b	9.9±1a	1.7±0.05a	7.8±2.3a	7.6±1.4a
			N1	16.2±1a	13.1±1b	9.0±1b	1.5±0.05a	6.4±2.3a	9.2±1.4a
		PD	R	16.3±1a	14.3±1a	9.6±1a	1.6±0.05a	7.5±2.3a	8.7±1.4a
			H	16.3±1a	13.8±1a	9.8±1a	1.6±0.05a	7.3±2.3a	8.6±1.4a
		SGT	NSG	16.5±1a	14.0±1a	9.4±1b	1.5±0.05a	7.4±2.3a	8.3±1.4a
			SG	16.0±1b	14.0±1a	10.1±1a	1.6±0.05a	7.3±2.3a	8.9±1.4a
		1 Means followed by the same letter, within the same column and factor, are not significantly different. 2 WI: Water condition; NF: Nitrogen fertilization; PD: Plant density; SGT: Stay-green trait; SG: Stay-green genotypes; NSG: non-stay-green genotypes; HW: high water irrigation; LW: low water irrigation; N3, N2, N1: nitrogen fertilization (0U), (30U) and (90U), respectively; KN (g kg-1): N-kern…
